# Supplementary material for: Indium tin oxide (ITO)-free, top-illuminated, flexible perovskite solar cells
Source: Royal Society of Chemistry journal article supplement (doi:10.1039/c6ta06657g), 2016-01-01
Supplement: c6ta06657g1.pdf [file c6ta06657g1.pdf]

## Electronic Supplementary Information

### Indium tin oxide (ITO)-free, top-illuminated, flexible perovskite solar cells

Fei Qin<sup>a</sup>, Jinhui Tong<sup>a</sup>, Ru Ge<sup>a</sup>, Bangwu Luo<sup>a</sup>, Fangyuan Jiang<sup>a</sup>, Tiefeng Liu<sup>a</sup>, Youyu Jiang<sup>a</sup>,  
Zeyang Xu<sup>b</sup>, Lin Mao<sup>a</sup>, Wei Meng<sup>a</sup>, Sixing Xiong<sup>a</sup>, Zaifang Li<sup>a</sup>, Liqiang Li<sup>b</sup> and Yinhua Zhou<sup>a,c,\*</sup>

<sup>a</sup>Wuhan National Laboratory for Optoelectronics, and School of Optical and Electronic Information, Huazhong University of Science and Technology, Wuhan 430074, China

*E-mail:* [yh\\_zhou@hust.edu.cn](mailto:yh_zhou@hust.edu.cn) (Y.H.Z.)

<sup>b</sup>Advanced Nano-materials Division, Suzhou Institute of Nano-Tech and Nano-Bionics, Chinese Academy of Sciences, Suzhou 215123, China

<sup>c</sup>Research Institute of Huazhong University of Science and Technology in Shenzhen, Shenzhen 518057, China

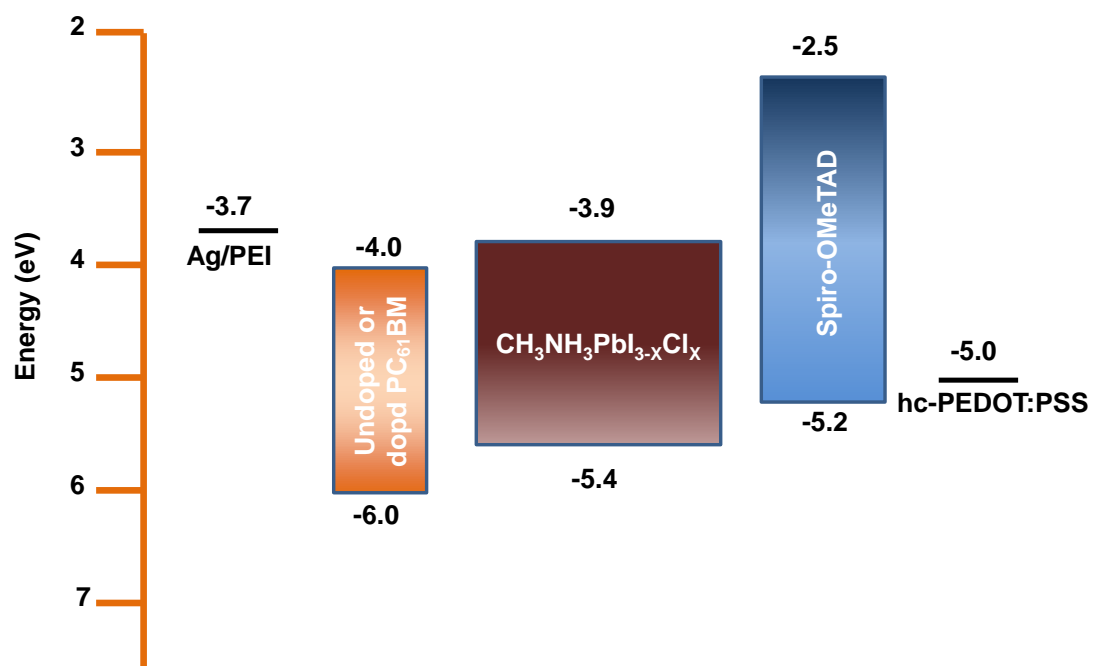

Fig. S1 The energy level diagram of the flexible perovskite solar cells.

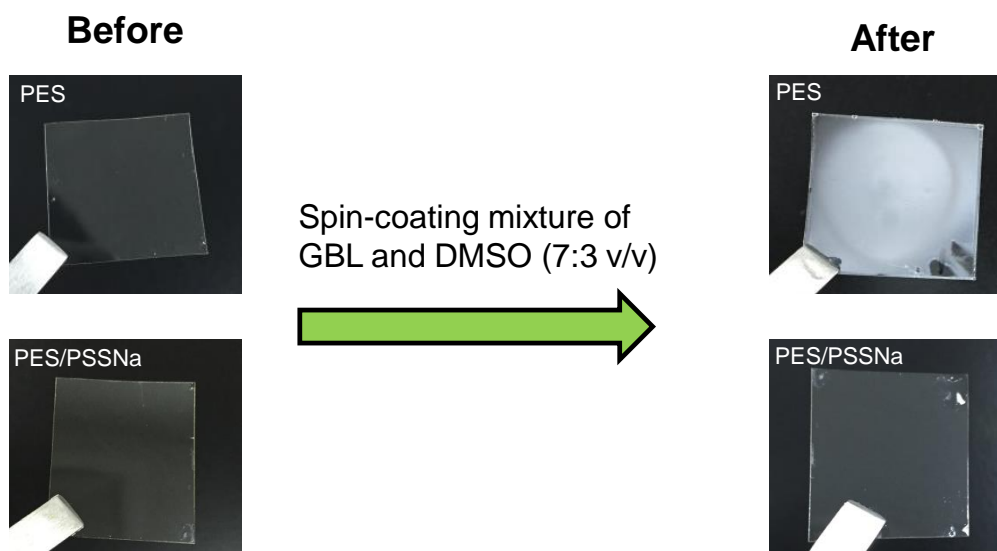

Fig. S2 Pictures of the PES and PES/PSSNa before and after spin coating the solvent mixture of GBL and DMSO (7:3, v/v).

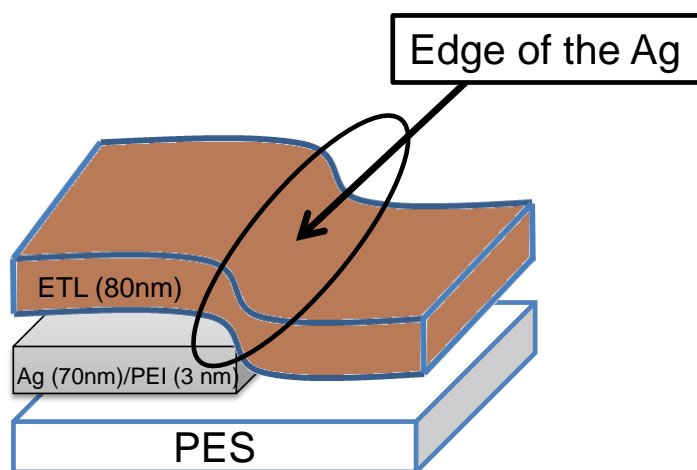

Fig. S3 The schematic diagram of the PES/Ag/ETL pattern.

As shown in Fig. S3, bottom silver electrodes were evaporated on half of the substrate with a thickness of 70 nm. And the thickness of the ETL (undoped or doped PC<sub>61</sub>BM) films is similar to that of silver electrode. At the edge of the silver (marked ellipse area), the ETL films may be much thinner than the actual thickness on PES/Ag or PES parts. When spin-coating the perovskite solution, solvent would permeate the PES substrate at this marked area. The fabricated flexible perovskite solar cells showed low device performance and poor reproducibility. A layer of PSSNa film is deposited on top of PES substrates could protect the PES substrate from the damage by the processing solvents, and therefore enhancing the device performance and reproducibility.
